# Supplementary material for: Distribution and sources of fallout 137 Cs and 239+240 Pu in Equatorial and Southern Hemisphere reference soils
Source: Copernicus journal article supplement (doi:10.5194/essd-2024-509), 2024-11-11
Supplement: Supplementary file 1 [file essd-2024-509-supplement.pdf]

Supplementary Material for

## **Distribution and sources of fallout $^{137}\text{Cs}$ and $^{239+240}\text{Pu}$ in Equatorial and Southern Hemisphere reference soils**

Gerald Dicen<sup>1,2</sup>, Floriane Guillevic<sup>1</sup>, Surya Gupta<sup>1</sup>, Pierre-Alexis Chaboche<sup>3,4,5</sup>, Katrin Meusburger<sup>6</sup>, Pierre Sabatier<sup>7</sup>, Olivier Evrard<sup>5</sup>, Christine Alewell<sup>1</sup>

<sup>1</sup>Environmental Geosciences, Department of Environmental Science, University of Basel, Bernoullistrasse 30, 4056 Basel, Switzerland

<sup>2</sup>Department of Science and Technology-Philippine Nuclear Research Institute (DOST-PNRI), Commonwealth Avenue, Diliman, 1101 Quezon City, Philippines

<sup>3</sup>International Research Fellow of Japan Society for the Promotion of Science (Postdoctoral Fellowships for Research in Japan (Standard)), Japan

<sup>4</sup>Institute of Environmental Radioactivity, Fukushima University, Kanayagawa, Japan

<sup>5</sup>Laboratoire des Sciences du Climat et de l'Environnement (LSCE/IPSL), Unité Mixte de Recherche 8212 (CEA-CNRS-UVSQ), Université Paris-Saclay, F-91191 Gif-sur-Yvette, France

<sup>6</sup>Swiss Federal Institute for Forest Snow and Landscape Research WSL, Birmensdorf, Zürich, Switzerland

<sup>7</sup>Université Savoie Mont-Blanc, CNRS, EDYTEM, F-73000 Chambéry, France

*Correspondence to:* Gerald Dicen ([gerald.dicen@unibas.ch](mailto:gerald.dicen@unibas.ch))

**Incl. Tables S1-S4 and Figure S1**

**Table S1. Covariates used in Random Forest implementation for <sup>137</sup>Cs and <sup>239+240</sup>Pu inventories prediction. Bioclimatic data were extracted from WorldClim 2.1 climate data for 1970-2000 (Fick and Hijmans 2017) at a 30 arc-second spatial resolution.**

| <b>Code</b>       | <b>Covariates Used</b>                                                                       |
|-------------------|----------------------------------------------------------------------------------------------|
| Latitude          | Latitude                                                                                     |
| Longitude         | Longitude                                                                                    |
| Elevation         | Elevation                                                                                    |
| AnnualMeanTemp    | Annual Mean Temperature                                                                      |
| MeanDiurnalRange  | Mean Diurnal Range (Mean of monthly (max temp - min temp))                                   |
| Isothermality     | Isothermality (Mean Diurnal Range/Temperature Annual Range) (×100)                           |
| TempSeasonality   | Temperature Seasonality (standard deviation ×100)                                            |
| MaxTempWarmMonth  | Max Temperature of Warmest Month                                                             |
| MinTempColdMonth  | Min Temperature of Coldest Month                                                             |
| TempAnnualRange   | Temperature Annual Range (Max Temperature of Warmest Month-Min Temperature of Coldest Month) |
| MeanTempWetQ      | Mean Temperature of Wettest Quarter                                                          |
| MeanTempDriQ      | Mean Temperature of Driest Quarter                                                           |
| MeanTempWarmQ     | Mean Temperature of Warmest Quarter                                                          |
| MeanTempColdQ     | Mean Temperature of Coldest Quarter                                                          |
| AnnualPrec        | Annual Precipitation                                                                         |
| PrecipWetMonth    | Precipitation of Wettest Month                                                               |
| PrecipDriMonth    | Precipitation of Driest Month                                                                |
| PrecipSeasonality | Precipitation Seasonality (Coefficient of Variation)                                         |
| PrecipWetQ        | Precipitation of Wettest Quarter                                                             |
| PrecipDriQ        | Precipitation of Driest Quarter                                                              |
| PrecipWarmQ       | Precipitation of Warmest Quarter                                                             |
| PrecipColdQ       | Precipitation of Coldest Quarter                                                             |

**Table S2. Summary statistics of  $^{137}\text{Cs}$  and  $^{239+240}\text{Pu}$  inventory data grouped by continent. Note that the French Polynesia was separated from Oceania to emphasize its high inventories within the latitudinal band.**

| FRN                   | Area               | Latitudinal Band | Mean   | Median | 1 <sup>st</sup> Quantile | 3 <sup>rd</sup> Quantile |
|-----------------------|--------------------|------------------|--------|--------|--------------------------|--------------------------|
| $^{137}\text{Cs}$     | Asia               | 0-10° N          | 88.78  | 76.54  | 68.89                    | 109.85                   |
|                       |                    | 0-10° S          | 99.83  | 121.51 | 52.40                    | 125.59                   |
|                       | French Polynesia   | 0-10° S          | 191.00 | 210.14 | 145.85                   | 217.01                   |
|                       |                    | 20-30° S         | 367.76 | 386.32 | 285.88                   | 450.92                   |
|                       | Oceania            | 10-20° S         | 34.08  | 18.93  | 14.71                    | 23.83                    |
|                       |                    | 20-30° S         | 112.29 | 43.12  | 17.01                    | 177.75                   |
|                       |                    | 30-40° S         | 150.01 | 42.62  | 30.70                    | 312.21                   |
|                       |                    | 40-50° S         | 121.78 | 49.03  | 25.89                    | 231.09                   |
|                       | South America      | 0-10° N          | 336.34 | 90.50  | 66.29                    | 852.23                   |
|                       |                    | 0-10° S          | 134.80 | 58.00  | 20.45                    | 64.97                    |
|                       |                    | 10-20° S         | 228.43 | 170.50 | 112.45                   | 386.22                   |
|                       |                    | 20-30° S         | 291.87 | 206.95 | 149.23                   | 353.95                   |
|                       | Sub-Saharan Africa | 30-40° S         | 446.94 | 354.88 | 301.27                   | 582.13                   |
|                       |                    | 40-50° S         | 659.04 | 391.79 | 336.57                   | 589.00                   |
|                       |                    | 50-60° S         | 243.90 | 200.37 | 145.07                   | 353.86                   |
|                       |                    | 60-70° S         | 241.56 | 241.56 | 215.86                   | 267.26                   |
|                       |                    | 0-10° N          | 407.94 | 126.81 | 24.27                    | 985.76                   |
|                       |                    | 10-20° N         | 899.91 | 872.72 | 483.34                   | 1174.50                  |
|                       |                    | 10-20° S         | 107.64 | 108.70 | 100.63                   | 113.61                   |
|                       |                    | 20-30° S         | 122.57 | 122.57 | 122.57                   | 122.57                   |
|                       |                    | 30-40° S         | 316.26 | 316.26 | 291.29                   | 341.22                   |
| $^{239+240}\text{Pu}$ | French Polynesia   | 0-10° S          | 11.75  | 12.80  | 7.83                     | 14.63                    |
|                       |                    | 20-30° S         | 76.26  | 82.50  | 24.00                    | 120.78                   |
|                       | Oceania            | 0-10° S          | 7.76   | 7.76   | 7.76                     | 7.76                     |
|                       |                    | 10-20° S         | 11.73  | 12.39  | 10.36                    | 13.84                    |
|                       |                    | 20-30° S         | 12.11  | 12.95  | 7.21                     | 15.23                    |
|                       |                    | 30-40° S         | 18.36  | 17.39  | 13.69                    | 21.42                    |
|                       | South America      | 40-60° S         | 16.13  | 14.40  | 9.99                     | 23.15                    |
|                       |                    | 0-20° N          | 6.85   | 6.85   | 4.81                     | 8.88                     |
|                       |                    | 0-10° S          | 11.10  | 11.10  | 6.66                     | 15.54                    |
|                       |                    | 10-20° S         | 9.62   | 9.62   | 4.44                     | 14.80                    |
|                       | Sub-Saharan Africa | 20-30° S         | 11.60  | 11.60  | 0.63                     | 22.57                    |
|                       |                    | 30-40° S         | 22.65  | 12.60  | 5.77                     | 44.57                    |
|                       |                    | 40-60° S         | 6.73   | 7.22   | 3.78                     | 9.20                     |
|                       |                    | 0-20° N          | 19.33  | 19.00  | 15.75                    | 21.75                    |
|                       |                    | 0-10° S          | 29.34  | 32.70  | 11.34                    | 45.65                    |
|                       |                    | 10-20° S         | 5.92   | 5.92   | 5.55                     | 6.29                     |
| 20-30° S              |                    | 14.43            | 11.84  | 9.25   | 22.20                    |                          |
| 30-40° S              |                    | 9.62             | 9.62   | 9.62   | 9.62                     |                          |

**Table S3. Summary of  $^{240}\text{Pu}/^{239}\text{Pu}$  atomic  $^{137}\text{Cs}/^{239+240}\text{Pu}$  activity ratios determined from different locations globally.**

| Fallout Source                   | Sample Location                                                 | Date of Sample Collection | N   | Sample types        | $^{240/239}\text{Pu}$ | SD    | $^{137}\text{Cs}/^{239+240}\text{Pu}^*$ | SD   | Authors                                                  |
|----------------------------------|-----------------------------------------------------------------|---------------------------|-----|---------------------|-----------------------|-------|-----------------------------------------|------|----------------------------------------------------------|
| <i>Pre-moratorium (pre-1958)</i> | Arctic                                                          | 1975, 1980                | 2   | ice core, sectioned | 0.24                  | 0.03  |                                         |      | <i>Koide et al. 1985</i>                                 |
|                                  | Antarctic                                                       | 1976, 1977                | 2   | ice core, sectioned | 0.29                  | 0.05  |                                         |      | <i>Koide et al. 1985</i>                                 |
|                                  | Ross Ice Shelf, Antarctica                                      | 1976                      | 1   | ice core, sectioned |                       |       | 11.54                                   | 5.23 | <i>Koide et al. 1979</i>                                 |
|                                  | Arctic                                                          |                           | 1   | ice core, sectioned |                       |       | 11.88                                   |      | <i>Koide et al. 1982</i>                                 |
|                                  | Antarctic                                                       |                           | 1   | ice core, sectioned |                       |       | 10.01                                   |      | <i>Koide et al. 1982</i>                                 |
| <i>UK</i>                        | Alpha Isle (within 500 m NEWS of test site), Montebello Islands | 1972, 1978                | 8   | soil                | 0.05                  |       |                                         |      | <i>Child and Hotchkis 2013</i>                           |
|                                  | Emu Field (within 500 m NEWS of test site), Emu                 | 1972, 1978                | 8   | soil                | 0.023                 |       |                                         |      | <i>Child and Hotchkis 2013</i>                           |
|                                  | Taranaki (2-3 km NW), Maralinga                                 | 2010-2012                 | 6   | soil                | 0.064                 | 0.008 |                                         |      | <i>Johansen et al. 2014</i>                              |
|                                  | Trimouille Island, Montebello (Mosaic G1)                       | 2015                      | 2   | soil                | 0.037                 | 0.002 |                                         |      | <i>Johansen et al. 2019</i>                              |
|                                  | Alpha Island, Montebello (Mosaic G2)                            | 2015                      | 2   | soil                | 0.053                 | 0.003 |                                         |      | <i>Johansen et al. 2019</i>                              |
|                                  | Trimouille Island, Montebello (Hurricane)                       | 2015                      | 2   | soil                | 0.027                 | 0.001 |                                         |      | <i>Johansen et al. 2019</i>                              |
|                                  | Taranaki (<10 km W), Maralinga                                  | 2011                      | 2   | soil                | 0.047                 | 0.008 | 0.17                                    |      | <i>Tims et al. 2013</i>                                  |
| <i>Global</i>                    | Global (31-70 N)                                                | 1970-1971                 | 24  | soil                | 0.18                  | 0.014 |                                         |      | <i>Kelley et al. 1999</i>                                |
|                                  | Global (0-30 N)                                                 | 1970-1971                 | 7   | soil                | 0.178                 | 0.019 |                                         |      | <i>Kelley et al. 1999</i>                                |
|                                  | Global (0-30 S)                                                 | 1970-1971                 | 8   | soil                | 0.173                 | 0.027 |                                         |      | <i>Kelley et al. 1999</i>                                |
|                                  | Global (31-70 S)                                                | 1970-1971                 | 6   | soil                | 0.185                 | 0.047 |                                         |      | <i>Kelley et al. 1999</i>                                |
|                                  | Swiss Alps                                                      | 2014                      | 10  | soil                | 0.183                 | 0.013 |                                         |      | <i>Meusburger et al. 2018</i>                            |
|                                  | Europe                                                          | 2009-2015                 | 160 | soil                | 0.19                  | 0.021 |                                         |      | <i>Meusburger et al. 2020</i>                            |
|                                  | US-wide                                                         | 1970-1971                 | 57  | soil                | 0.176                 | 0.014 |                                         |      | <i>Krey et al. 1976</i>                                  |
|                                  | US-wide                                                         | 1983, 1987                | 66  | soil                | 0.18                  | 0.006 | 18.34                                   | 1.95 | <i>McArthur and Miller 1989</i>                          |
|                                  | South Korea                                                     | 2010                      | 7   | soil                | 0.182                 | 0.015 | 24.44                                   | 4.75 | <i>Meusburger et al. 2016</i>                            |
|                                  | Utah                                                            | 1979                      | 4   | soil                | 0.1817                | 0.002 | 19.94                                   | 2.49 | <i>Krey and Beck 1981</i>                                |
|                                  | Denver, Colorado                                                | 1994                      | 15  | soil                |                       |       | 19.09                                   | 2.01 | <i>Hodge et al. 1996</i>                                 |
|                                  | New York, San Francisco, and Cape Cod                           | 1972-1973                 | 10  | soil                |                       |       | 18.95                                   | 2.99 | <i>Hardy 1975</i>                                        |
|                                  | South Korea-wide                                                | 1995                      | 27  | soil                |                       |       | 20.93                                   | 3    | <i>Kim et al. 1998</i>                                   |
|                                  | ISPRA, Italy                                                    | 1961-1965                 | 53  | airfilter           |                       |       | 18.74                                   | 3.01 | <i>de Bortoli et al. 1968</i>                            |
|                                  | Global (?)                                                      | 1959-1970                 |     | airfilter           | 0.179                 |       |                                         |      | <i>HASL 1973 as cited in Bertine et al. 1983</i>         |
|                                  | Scotland, England                                               | 1977                      |     | soil                |                       |       | 19.72                                   | 3.4  | <i>Earkins et al. 1981 as cited in Hodge et al. 1996</i> |

|               |                                     |          |    |                   |        |       |      |      |                              |
|---------------|-------------------------------------|----------|----|-------------------|--------|-------|------|------|------------------------------|
| <i>French</i> | Fangataufa, French Polynesia (Kilo) | 1996     | 3  | loose coral rocks | 0.049  | 0.001 |      |      | <i>Hrnecek et al. 2005</i>   |
|               | Mururoa, French Polynesia (Faucon)  | 1996     | 3  | soil              | 0.018  | 0.001 |      |      | <i>Hrnecek et al. 2005</i>   |
|               | Mururoa, French Polynesia (Colette) | 1996     |    | coral             | 0.019  | 0.002 |      |      | <i>Hrnecek et al. 2005</i>   |
|               | Fangataufa, French Polynesia        | 1996     |    | lagoon sediment   | 0.05   |       |      |      | <i>Chiappini et al. 1999</i> |
|               | Mururoa, French Polynesia           | 1996     | 4  | lagoon sediment   | 0.033  | 0.022 |      |      | <i>Chiappini et al. 1999</i> |
|               | Mururoa, French Polynesia           | 1996 (?) | 11 | lagoon sediment   | 0.041  | 0.009 |      |      | <i>Chiappini et al. 1996</i> |
|               | Fangataufa, French Polynesia        | 1996     | 8  | lagoon sediment   | 0.0501 | 0.003 |      |      | <i>Chiappini et al. 1998</i> |
|               | Gambier Islands, French Polynesia   | 2018     | 7  | soil              | 0.0163 | 0.005 | 1.74 | 0.35 | <i>Bouisset et al. 2021</i>  |

\*Decay-corrected to 2024

**Table S4. Relative contributions of the French and British fallouts in the Equatorial and Southern Hemisphere reference soils calculated from  $^{239}\text{Pu}/^{240}\text{Pu}$  atomic ratios.**

| <b>Authors</b>  | <b>Year Published</b> | <b>Continent</b> | <b>Country</b>   | <b>Sample Name or Label</b> | <b><math>^{239}\text{Pu}/^{240}\text{Pu}</math></b> | <b>Uncertainty</b> | <b>% French or British Fallout*</b> | <b>Uncertainty</b> |
|-----------------|-----------------------|------------------|------------------|-----------------------------|-----------------------------------------------------|--------------------|-------------------------------------|--------------------|
| Bouisset et al. | 2018                  | Oceania          | French Polynesia | Hv1                         | 0.153333333                                         | 0.004041452        | 18.39                               | 3.38               |
| Bouisset et al. | 2018                  | Oceania          | French Polynesia | Hv4                         | 0.143333333                                         | 0.010503968        | 25.29                               | 7.70               |
| Bouisset et al. | 2018                  | Oceania          | French Polynesia | Hv2                         | 0.143                                               | 0.015099669        | 25.52                               | 10.74              |
| Bouisset et al. | 2018                  | Oceania          | French Polynesia | Hv5                         | 0.129333333                                         | 0.002516611        | 34.94                               | 4.01               |
| Bouisset et al. | 2021                  | Oceania          | French Polynesia | Ga7                         | 0.0566                                              | 0.008              | 85.10                               | 10.39              |
| Bouisset et al. | 2021                  | Oceania          | French Polynesia | Ga5                         | 0.0418                                              | 0.0075             | 95.31                               | 11.13              |
| Bouisset et al. | 2021                  | Oceania          | French Polynesia | Ga3                         | 0.0406                                              | 0.0078             | 96.14                               | 11.31              |
| Bouisset et al. | 2021                  | Oceania          | French Polynesia | Ga1                         | 0.0383                                              | 0.0062             | 97.72                               | 10.98              |
| Bouisset et al. | 2021                  | Oceania          | French Polynesia | Ga2                         | 0.0338                                              | 0.0052             | 100.83                              | 11.03              |
| Bouisset et al. | 2021                  | Oceania          | French Polynesia | Ga6                         | 0.0301                                              | 0.0048             | 103.38                              | 11.20              |
| Lal et al.      | 2020                  | Oceania          | Australia        | Montebello Island           | 0.045                                               | 0.002              | 99.26                               | 11.05              |
| Lal et al.      | 2020                  | Oceania          | Australia        | Central Australia           | 0.069                                               | 0.005              | 81.62                               | 9.72               |
| Tims et al.     | 2013                  | Oceania          | Australia        | F1                          | 0.069                                               | 0.005              | 81.62                               | 9.72               |
| Tims et al.     | 2013                  | Oceania          | Australia        | T6                          | 0.098                                               | 0.005              | 60.29                               | 7.60               |
| Tims et al.     | 2013                  | Oceania          | Australia        | T5                          | 0.107                                               | 0.031              | 53.68                               | 23.55              |
| Tims et al.     | 2013                  | Oceania          | Australia        | E                           | 0.113                                               | 0.007              | 49.26                               | 7.48               |
| Lal et al.      | 2020                  | Oceania          | Australia        | Maralinga                   | 0.113                                               | 0.007              | 49.26                               | 7.48               |
| Lal et al.      | 2020                  | Oceania          | Australia        | Alice Sprins                | 0.114                                               | 0.026              | 48.53                               | 19.85              |
| Lal et al.      | 2017                  | Oceania          | Australia        | A                           | 0.120476                                            | 0.002234           | 43.77                               | 5.10               |
| Lal et al.      | 2017                  | Oceania          | Australia        | D                           | 0.122224                                            | 0.00338            | 42.48                               | 5.30               |
| Lal et al.      | 2017                  | Oceania          | Australia        | C                           | 0.12239                                             | 0.001776           | 42.36                               | 4.85               |
| Lal et al.      | 2020                  | Oceania          | Australia        | Devils Marbles              | 0.127                                               | 0.033              | 38.97                               | 24.64              |
| Tims et al.     | 2013                  | Oceania          | Australia        | T4                          | 0.133                                               | 0.009              | 34.56                               | 7.64               |
| Lal et al.      | 2020                  | Oceania          | Australia        | Daly River                  | 0.136                                               | 0.011              | 32.35                               | 8.84               |
| Lal et al.      | 2020                  | Oceania          | Australia        | Darwin                      | 0.136                                               | 0.011              | 32.35                               | 8.84               |
| Lal et al.      | 2020                  | Oceania          | Australia        | Port Hedland                | 0.136                                               | 0.03               | 32.35                               | 22.35              |
| Tims et al.     | 2013                  | Oceania          | Australia        | T3                          | 0.136                                               | 0.008              | 32.35                               | 6.88               |
| Lal et al.      | 2020                  | Oceania          | Australia        | Vlamingh Head               | 0.136                                               | 0.03               | 32.35                               | 22.35              |
| Tims et al.     | 2013                  | Oceania          | Australia        | D2b                         | 0.137                                               | 0.005              | 31.62                               | 5.07               |

|                  |      |               |              |                         |             |             |       |      |
|------------------|------|---------------|--------------|-------------------------|-------------|-------------|-------|------|
| Lal et al.       | 2017 | Oceania       | Australia    | B                       | 0.137838    | 0.003002    | 31.00 | 4.07 |
| Srnik et al.     | 2014 | Oceania       | Australia    | Herbert River           | 0.142       | 0.005       | 27.94 | 4.80 |
| Tims et al.      | 2013 | Oceania       | Australia    | T2                      | 0.144       | 0.008       | 26.47 | 6.57 |
| Lal et al.       | 2020 | Oceania       | Australia    | Sydney                  | 0.146       | 0.013       | 25.00 | 9.95 |
| Froehlick et al. | 2019 | Oceania       | Cook Islands | Raemaru                 | 0.148       |             | 23.53 | 2.60 |
| Lal et al.       | 2020 | Oceania       | Australia    | Herbert River           | 0.149       | 0.003       | 22.79 | 3.35 |
| Everett et al.   | 2008 | Oceania       | Australia    | Herbert River catchment | 0.149       |             | 22.79 | 2.52 |
| Froehlick et al. | 2019 | Oceania       | Cook Islands | Raemaru                 | 0.149       |             | 22.79 | 2.52 |
| Lal et al.       | 2020 | Oceania       | Australia    | Townsville              | 0.149       | 0.003       | 22.79 | 3.35 |
| Tims et al.      | 2013 | Oceania       | Australia    | K1                      | 0.151       | 0.006       | 21.32 | 5.00 |
| Tims et al.      | 2013 | Oceania       | Australia    | M1a                     | 0.16        | 0.011       | 14.71 | 8.25 |
| Tims et al.      | 2013 | Oceania       | Australia    | M1c                     | 0.16        | 0.003       | 14.71 | 2.74 |
| Lal et al.       | 2020 | Oceania       | Australia    | Namadgi                 | 0.16        | 0.011       | 14.71 | 8.25 |
| Lal et al.       | 2020 | Oceania       | Australia    | Sydney                  | 0.171       | 0.001       | 6.62  | 1.04 |
| Hardy et al.     | 1973 | Oceania       | Australia    | Melbourne               | 0.1716      | 0.0014      | 6.18  | 1.24 |
| Lal et al.       | 2020 | Oceania       | Australia    | Melbourne               | 0.172       | 0.001       | 5.88  | 0.99 |
| Lal et al.       | 2020 | Oceania       | Australia    | Melbourne               | 0.172       | 0.001       | 5.88  | 0.99 |
| Hardy et al.     | 1973 | Oceania       | Australia    | Brisbane                | 0.1768      | 0.0027      | 2.35  | 2.01 |
| Lal et al.       | 2020 | Oceania       | Australia    | Adelaide                | 0.177       | 0.002       | 2.21  | 1.49 |
| Lal et al.       | 2020 | Oceania       | Australia    | Brisbane                | 0.177       | 0.003       | 2.21  | 2.22 |
| Lal et al.       | 2020 | Oceania       | Australia    | Brisbane                | 0.177       | 0.003       | 2.21  | 2.22 |
| Hardy et al.     | 1973 | Oceania       | New Zealand  | Greymouth               | 0.1845      | 0.0015      | 0.00  | 0.00 |
| Lal et al.       | 2020 | Oceania       | Australia    | Perth                   | 0.182       | 0.011       | 0.00  | 0.00 |
| Raab et al.      | 2022 | Oceania       | New Zealand  | R1                      | 0.194198855 | 0.035573866 | 0.00  | 0.00 |
| Raab et al.      | 2022 | Oceania       | New Zealand  | R2                      | 0.206301325 | 0.014208609 | 0.00  | 0.00 |
| Hardy et al.     | 1973 | Oceania       | New Zealand  | S. Canterbury           | 0.1901      | 0.0036      | 0.00  | 0.00 |
| Tims et al.      | 2013 | Oceania       | Australia    | T1                      | 0.194       | 0.018       | 0.00  | 0.00 |
| Chaboche et al.  | 2022 | South America | Antarctica   | A1                      | 0.195       | 0.015       | 0.00  | 0.00 |
| Chaboche et al.  | 2022 | South America | Antarctica   | A2                      | 0.184       | 0.018       | 0.00  | 0.00 |
| Kelley et al.    | 1999 | South America | Brazil       | Belem S-1607            | 0.1825      | 0.0029      | 0.00  | 0.00 |
| Chaboche et al.  | 2022 | South America | Peru         | PASO05                  | 0.181       | 0.015       | 0.00  | 0.00 |
| Kelley et al.    | 1999 | South America | Chile        | Punta Arenas S-1707     | 0.2045      | 0.0046      | 0.00  | 0.00 |

|                         |      |                    |               |                     |        |        |       |       |
|-------------------------|------|--------------------|---------------|---------------------|--------|--------|-------|-------|
| Chaboche et al.         | 2022 | South America      | French Guiana | ROC                 | 0.189  | 0.032  | 0.00  | 0.00  |
| Chaboche et al.         | 2022 | South America      | Peru          | PASO02              | 0.178  | 0.013  | 1.38  | 8.97  |
| Kelley et al.           | 1999 | South America      | Colombia      | Bogota S-1599       | 0.1774 | 0.0039 | 1.79  | 2.70  |
| Chamizo et al.          | 2011 | South America      | Chile         | Chaiten             | 0.176  | 0.015  | 2.76  | 10.35 |
| Kelley et al.           | 1999 | South America      | Venezuela     | Maracay S-1598      | 0.1721 | 0.0034 | 5.45  | 2.41  |
| Hardy et al.            | 1973 | South America      | Brazil        | Rio de Janeiro      | 0.1676 | 0.0025 | 8.55  | 1.94  |
| Chamizo et al.          | 2011 | South America      | Chile         | Iquique             | 0.166  | 0.008  | 9.66  | 5.61  |
| Kelley et al.           | 1999 | South America      | Equador       | Guayaquil S-1627    | 0.1602 | 0.0023 | 13.66 | 2.13  |
| Kelley et al.           | 1999 | South America      | Peru          | Lima S-1632         | 0.1565 | 0.003  | 16.21 | 2.66  |
| Kelley et al.           | 1999 | South America      | Chile         | Puerto Montt S-1690 | 0.1563 | 0.0013 | 16.34 | 1.92  |
| Salmani-Ghabeshi et al. | 2018 | South America      | Chile         | Valle Alegre        | 0.156  | 0.027  | 16.55 | 18.70 |
| Salmani-Ghabeshi et al. | 2018 | South America      | Chile         | Los Maitenes        | 0.155  | 0.057  | 17.24 | 39.35 |
| Salmani-Ghabeshi et al. | 2018 | South America      | Chile         | La Greda            | 0.149  | 0.016  | 21.38 | 11.25 |
| Salmani-Ghabeshi et al. | 2018 | South America      | Chile         | Santa Barbara       | 0.144  | 0.007  | 24.83 | 5.47  |
| Chaboche et al.         | 2022 | South America      | Brazil        | Conceicao           | 0.135  | 0.006  | 31.03 | 5.24  |
| Chamizo et al.          | 2011 | South America      | Chile         | Santa Barbara       | 0.134  | 0.007  | 31.72 | 5.84  |
| Chamizo et al.          | 2011 | South America      | Chile         | Punchuncavi         | 0.13   | 0.02   | 34.48 | 14.25 |
| Salmani-Ghabeshi et al. | 2018 | South America      | Chile         | Puchuncavi          | 0.128  | 0.013  | 35.86 | 9.70  |
| Chamizo et al.          | 2011 | South America      | Chile         | Antofagasta         | 0.12   | 0.04   | 41.38 | 27.92 |
| Hardy et al.            | 1973 | South America      | Chile         | Santiago            | 0.1156 | 0.0017 | 44.41 | 4.74  |
| Chamizo et al.          | 2011 | South America      | Chile         | Chillan             | 0.111  | 0.008  | 47.59 | 7.39  |
| Hardy et al.            | 1973 | South America      | Argentina     | Buenos Aires        | 0.1075 | 0.0007 | 50.00 | 5.20  |
| Chamizo et al.          | 2011 | South America      | Chile         | La Parva            | 0.041  | 0.003  | 95.86 | 10.13 |
| Salmani-Ghabeshi et al. | 2018 | Sub-Saharan Africa | Mozambique    | Maputo MA1/11       | 0.171  | 0.022  | 0.00  | 0.00  |
| Salmani-Ghabeshi et al. | 2018 | Sub-Saharan Africa | South Africa  | Durban DU1/11       | 0.172  | 0.012  | 0.00  | 0.00  |
| Kelley et al.           | 1999 | Sub-Saharan Africa | Angola        | Luanda              | 0.174  | 0.014  | 0.00  | 0.00  |
| Hardy et al.            | 1973 | Sub-Saharan Africa | South Africa  | Angra dos Reis      | 0.178  | 0.0015 | 0.00  | 0.00  |
| Kelley et al.           | 1999 | Sub-Saharan Africa | Zimbabwe      | Harare              | 0.1793 | 0.0029 | 0.00  | 0.00  |
| Kelley et al.           | 1999 | Sub-Saharan Africa | Kenya         | Muguga              | 0.1897 | 0.0026 | 0.00  | 0.00  |
| Hardy et al.            | 1973 | Sub-Saharan Africa | S. Africa     | Stellenbosch        | 0.2011 | 0.0027 | 0.00  | 0.00  |

\*Calculated using the values from Table 1. Zero values indicate sole contribution from global fallout.



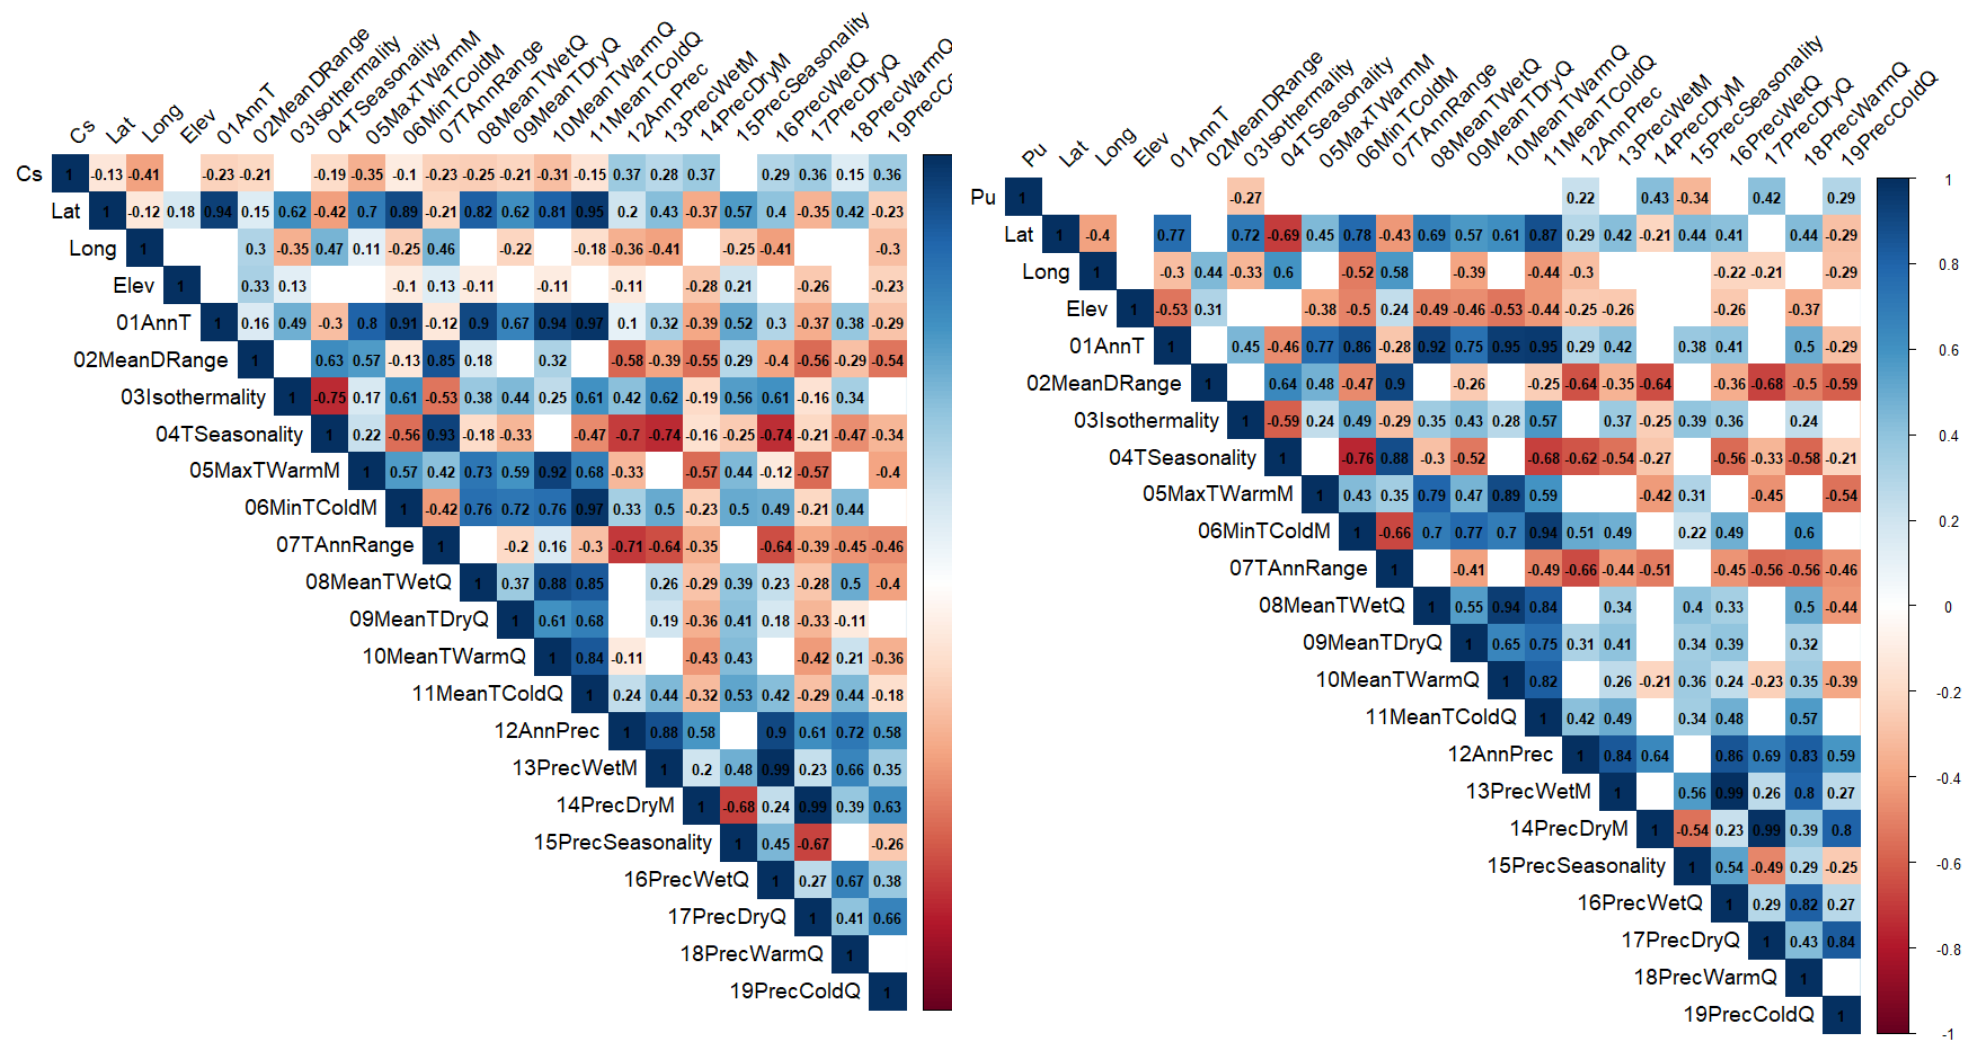

Figure S1. Spearman rank correlation between  $^{137}\text{Cs}$  and  $^{239+240}\text{Pu}$  inventories with location, elevation, and bioclimatic variables from 1970-2000 from WorldClim.org. White blocks indicate correlations that are not significant ( $p > 0.05$ ).
